# Supplementary material for: A blinded clinical study using a subepidermal moisture biocapacitance measurement device for early detection of pressure injuries
Source: PubMed Central journal article supplement (PMC7217158; doi:10.1111/wrr.12790), 2020-01-21

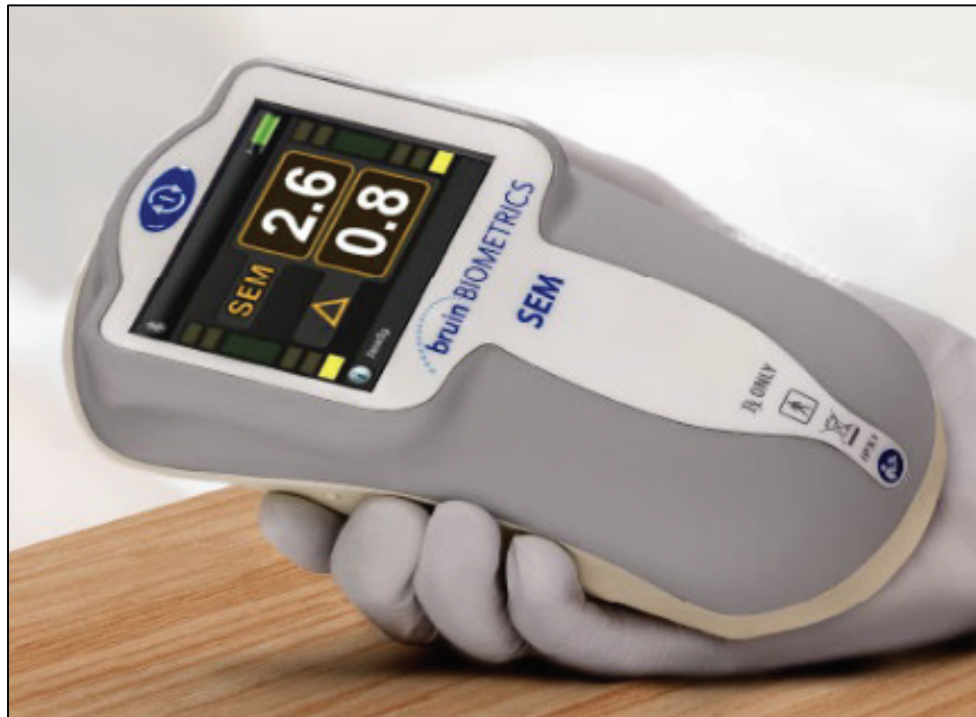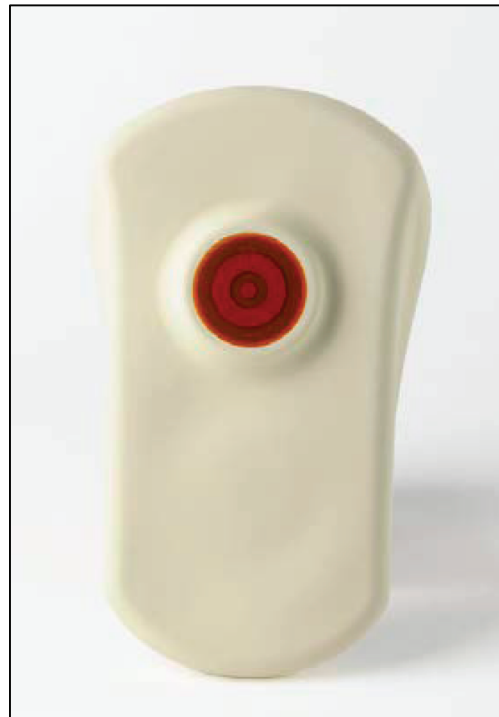

Supplement: WRR-28-364-s003.pdf [file WRR-28-364-s003.pdf]
